# Supplementary material
Source: PubMed Central journal article supplement (PMC6207474)
Supplement: NIHMS1506777-supplement-1.pdf [file NIHMS1506777-supplement-1.pdf]

**Supplemental Table 1. Adjusted association between age of SLE onset and incidence  
of cardiac manifestations**

|                         | Myopericarditis |               |         | Valvular Insufficiency |              |         |
|-------------------------|-----------------|---------------|---------|------------------------|--------------|---------|
|                         | IRR             | 95% CI        | p-value | IRR                    | 95% CI       | p-value |
| Child-onset             | 4.38            | [2.42, 7.95]  | <0.001  | 0.52                   | [0.44, 0.61] | <0.001  |
| Female sex              | 0.64            | [0.23, 1.71]  | 0.37    | 0.72                   | [0.52, 1.01] | 0.05    |
| Race/Ethnicity          |                 |               |         |                        |              |         |
| Black                   | 1.82            | [0.97, 3.41]  | 0.06    | 0.78                   | [0.51, 1.20] | 0.26    |
| Hispanic                | 0.46            | [0.13, 1.59]  | 0.22    | 1.09                   | [0.78, 1.51] | 0.62    |
| Asian                   | 1.16            | [0.52, 2.63]  | 0.72    | 1.36                   | [0.60, 3.10] | 0.46    |
| Nephritis               | 6.68            | [3.58, 12.45] | <0.001  | 6.30                   | [5.48, 7.25] | <0.001  |
| Cerebrovascular disease | 2.16            | [1.00, 4.68]  | 0.05    | 2.67                   | [1.82, 3.93] | <0.001  |
| Seizure                 | 1.24            | [0.41, 3.76]  | 0.70    | 2.37                   | [1.21, 4.64] | 0.012   |
| Psychiatric disorder    | 0.64            | [0.33, 1.22]  | 0.18    | 1.37                   | [1.24, 1.53] | <0.001  |
| aPLS / VTE*             | 7.00            | [4.31, 11.34] | <0.001  | 3.70                   | [2.12, 6.46] | <0.001  |

Multivariable negative binomial regression models (N = 6460 for myopericarditis and N = 6300 for valvular insufficiency) estimating incidence rate ratios of acute cardiac diagnoses in children versus adults, adjusted for demographic and disease characteristics and clustering by region.

\* aPLS = antiphospholipid antibody syndrome; VTE = venous thromboembolic event
